# Supplementary material
Source: HighWire-hosted journal article supplement (https://www.cmajopen.ca/highwire/filestream/80889/field_highwire_adjunct_files/0/open-2014-0063-1-at.pdf)
Supplement: open-2014-0063-1-at.pdf [file open-2014-0063-1-at.pdf]

## Appendix 1 (as supplied by the authors): Diagnostic codes

|                                  | <b>Diagnostic codes</b>                                                                                                                                                                                                                                                                                  |
|----------------------------------|----------------------------------------------------------------------------------------------------------------------------------------------------------------------------------------------------------------------------------------------------------------------------------------------------------|
| Inflammatory bowel disease (IBD) | At least five times physician claims or hospitalization for IBD<br>ICD-9 555, 556<br>ICD-10 K50, K51                                                                                                                                                                                                     |
| Colorectal cancer (CRC)          | ICD-9 153.0-153.4,153.6-154.1<br>ICD-10 C180, C182-189,C19,C20                                                                                                                                                                                                                                           |
| Polypectomy                      | Z571 Excision of the first polyp $\geq$ 3 mm through the colonoscope<br>E720 Each additional polyp $\geq$ 3 mm<br>Z764/ Z765 Excision of obstructive tumor or stricture through colonoscope<br>E687 with laser debulking<br>E685 total excision of very large sessile polyp (> 3 cm) through colonoscope |
| Cecal intubation                 | E747 to cecum<br>E705 into terminal ileum                                                                                                                                                                                                                                                                |
